# Supplementary material for: The Effects of the Binder and Buffering Matrix on InSb-Based Anodes for High-Performance Rechargeable Li-Ion Batteries
Source: MDPI journal article supplement (doi:10.3390/nano11123420), 2021-12-17
Supplement: s1 [file s1]

## Supplementary Information

# The Effects of the Binder and Buffering Matrix on InSb-based Anodes for High-Performance Rechargeable Li-Ion Batteries

Vo Pham Hoang Huy, Il Tae Kim \* and Jaehyun Hur \*

Department of Chemical and Biological Engineering, Gachon University, Seongnam, Gyeonggi 13120, Korea; vophamhoanghuy@yahoo.com.vn

\* Correspondence: itkim@gachon.ac.kr (I.T.K.); jhhur@gachon.ac.kr (J.H.); Tel.: +82-31-750-8835 (I.T.K.); +82-31-750-5593 (J.H.)

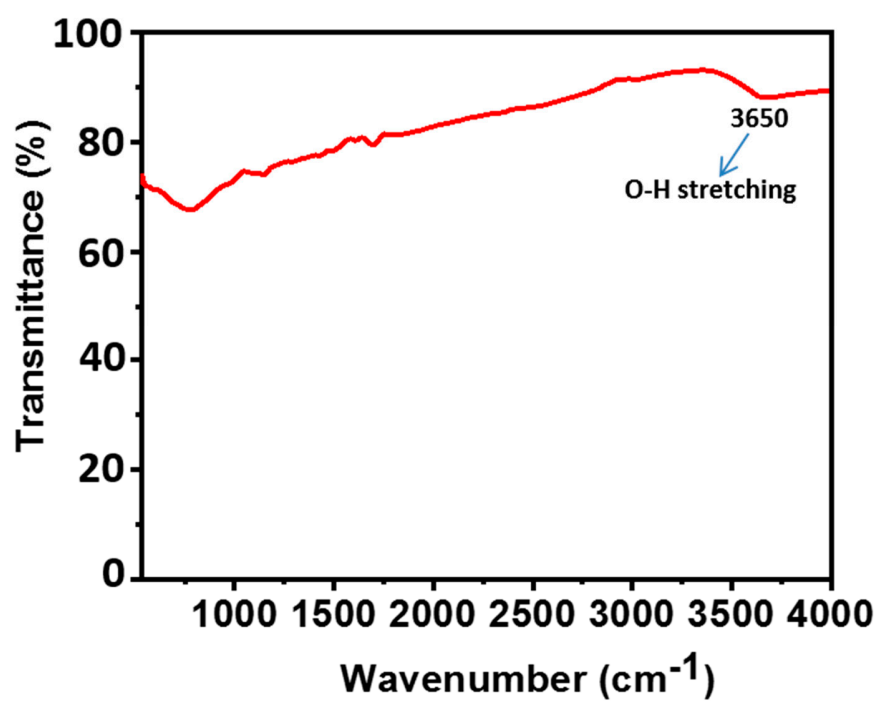

**Figure S1.** FT-IR results of InSb powder.

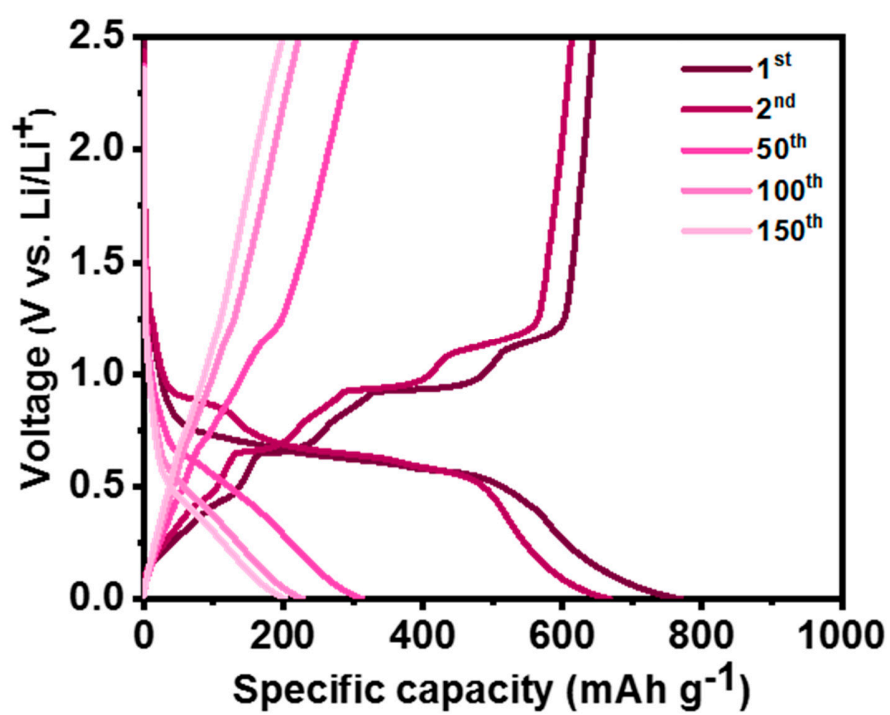

Figure S2. GCD curves of InSb\_PVDF.

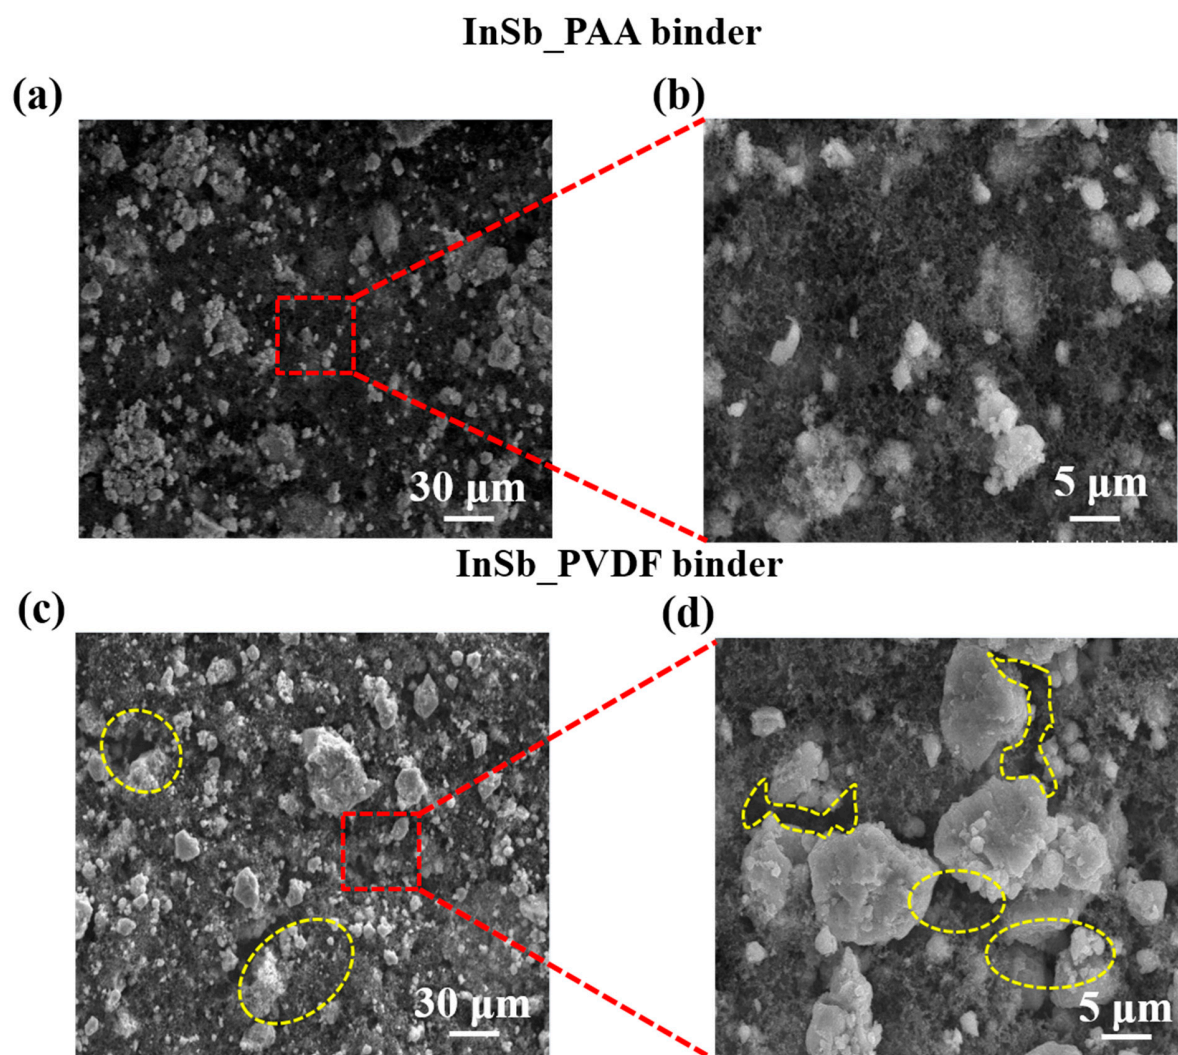

**Figure S3.** SEM images of (a,b) InSb\_PAA, (c,d) InSb\_PVDF binder at different magnification.

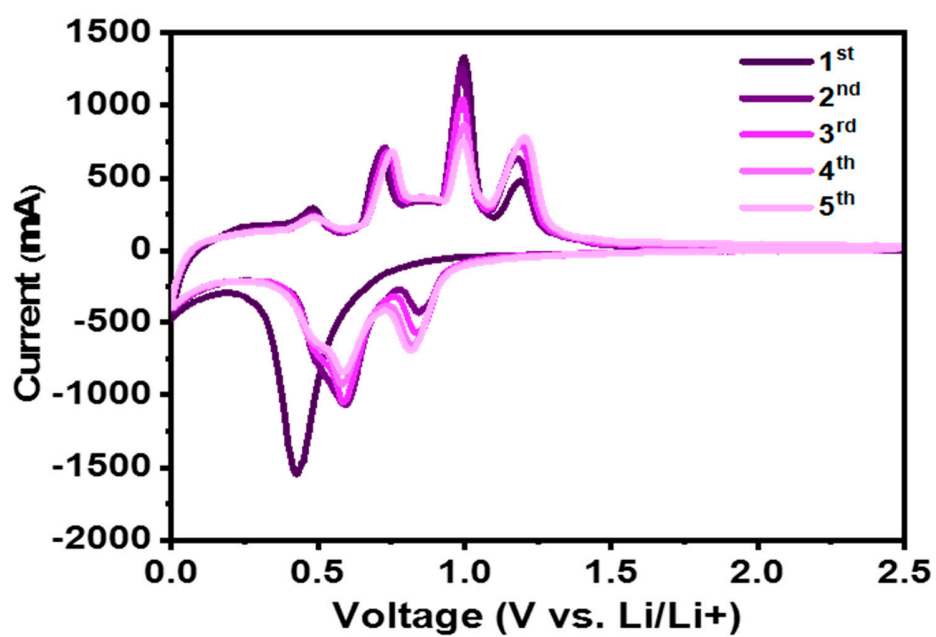

Figure S4. CV curves of InSb\_PVDF from first to fifth cycle.

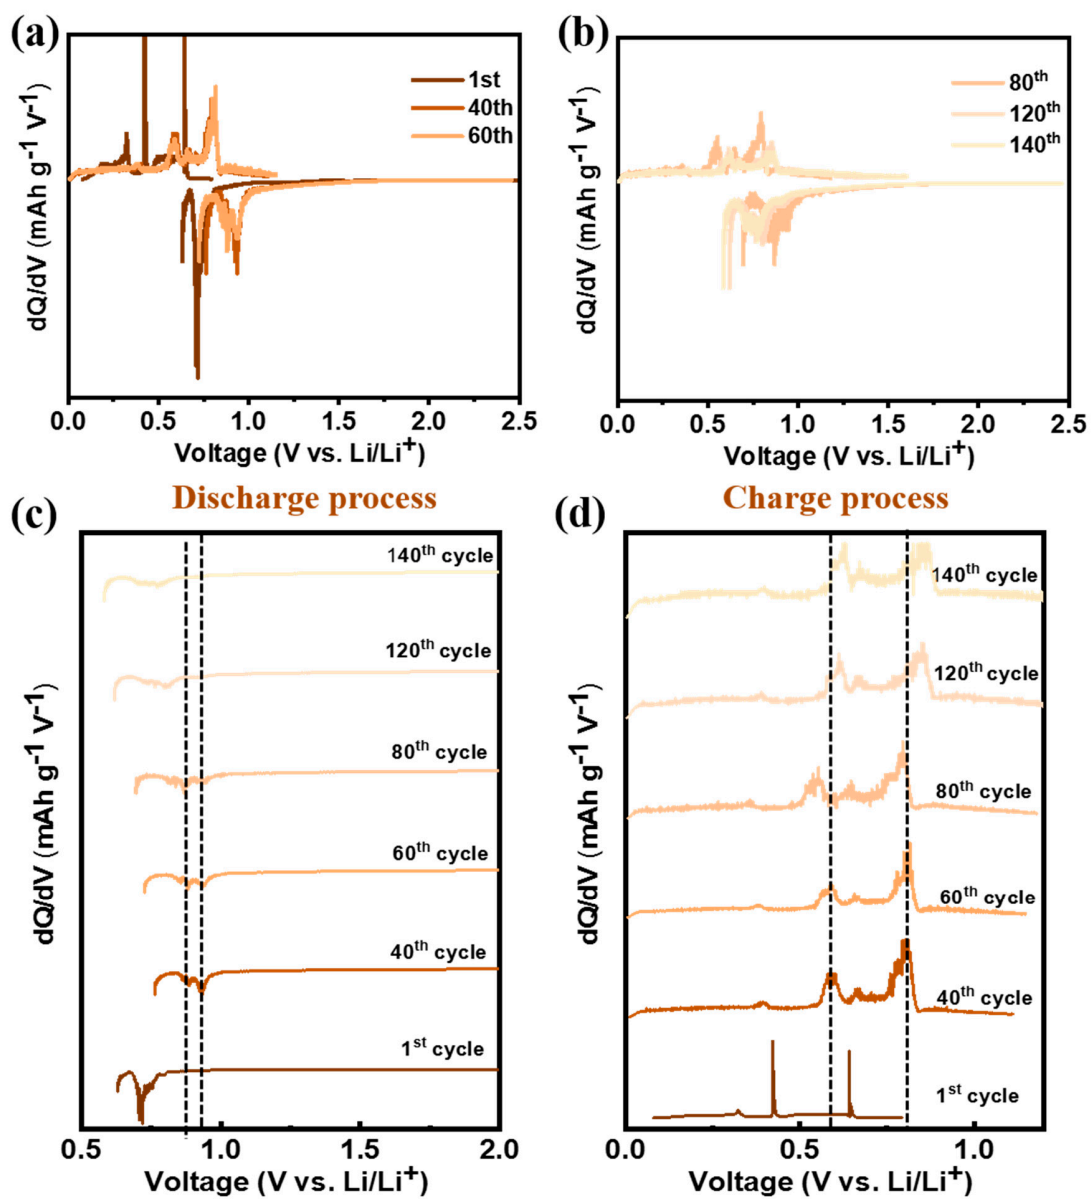

**Figure. S5.** DCP of InSb\_PAA during 140 cycles measured at 100 mA g<sup>-1</sup>: (a) 1–60 cycle, (b) 80–140 cycle. Enlarged view of (c) reduction peak and (d) oxidation peak.

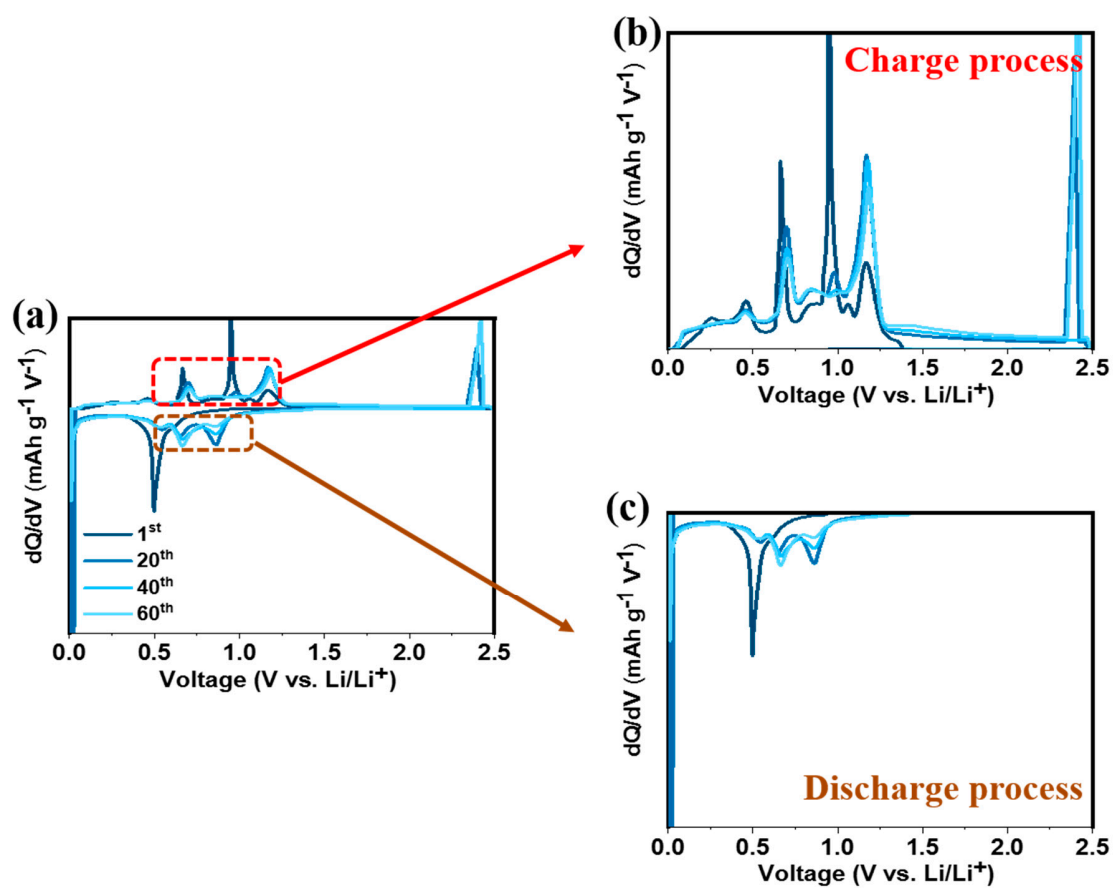

**Figure S6.** (a) DCP of InSb\_PAA during initial 60 cycles measured at 500 mA g<sup>-1</sup>. Enlarged view of (b) oxidation peak and (c) reduction peak.

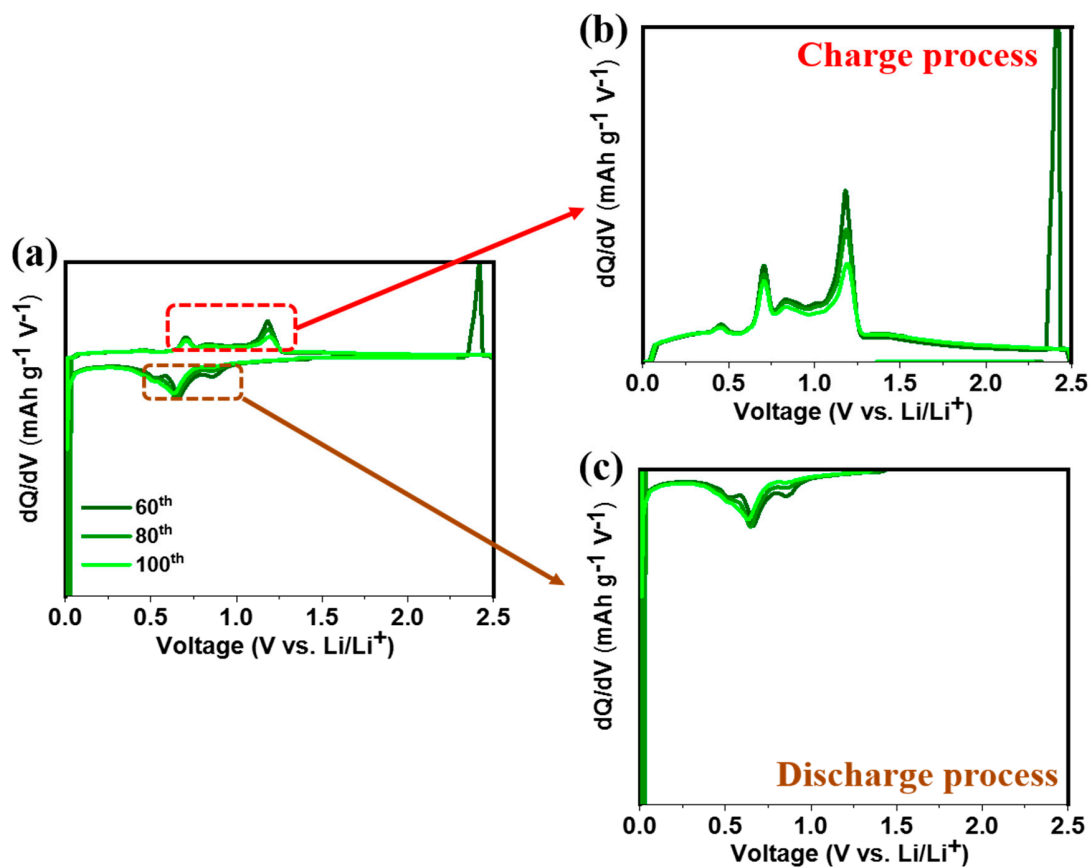

**Figure S7.** (a) DCP of InSb\_PAA from 60<sup>th</sup> to 100<sup>th</sup> cycle measured at 500 mA g<sup>-1</sup>. Enlarged view of (b) oxidation peak and (c) reduction peak.



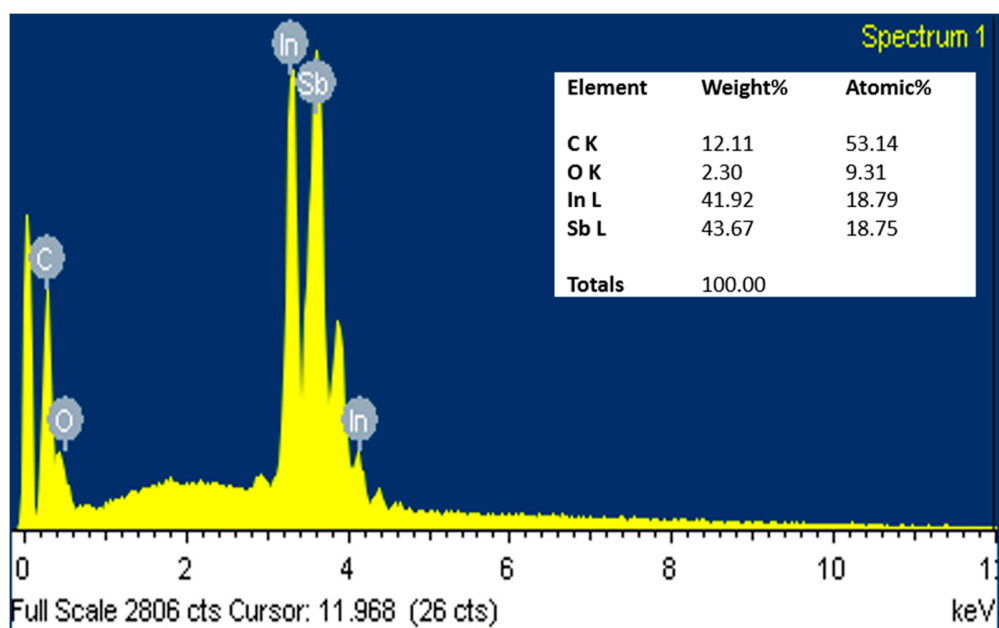

**Figure S8.** EDX spectrum of synthesized InSb–C.

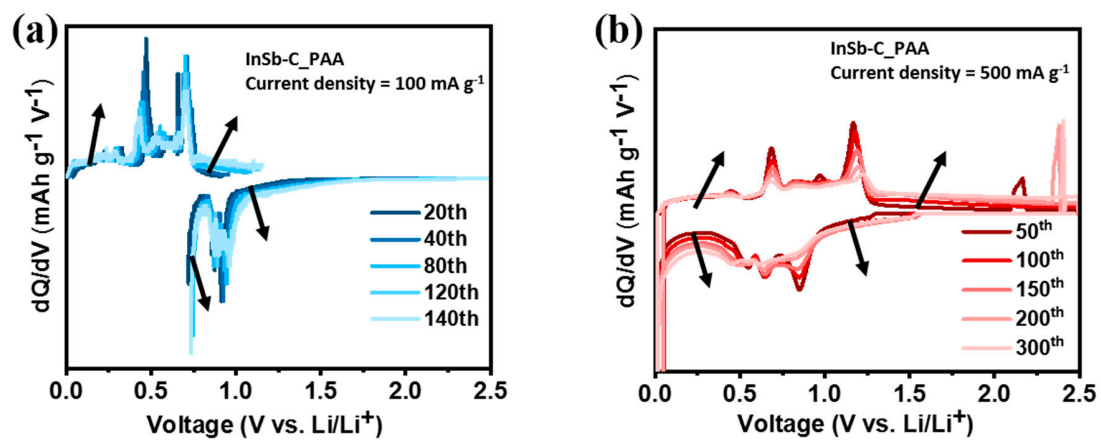

**Figure S9.** DCP profiles of InSb-C\_PAA electrodes at current density of (a) 100 mA g<sup>-1</sup> during 140 cycles and (b) 500 mA g<sup>-1</sup> during 300 cycles.

**(a) Current density: 100 mA g<sup>-1</sup>**

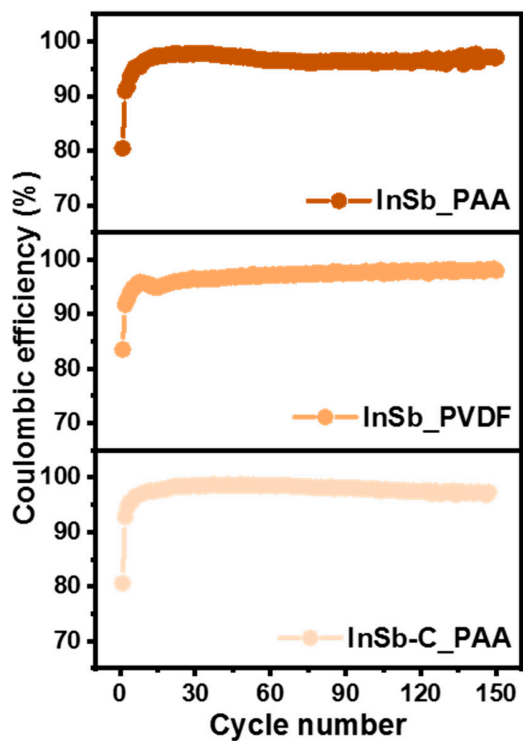

**(b) Current density: 500 mA g<sup>-1</sup>**

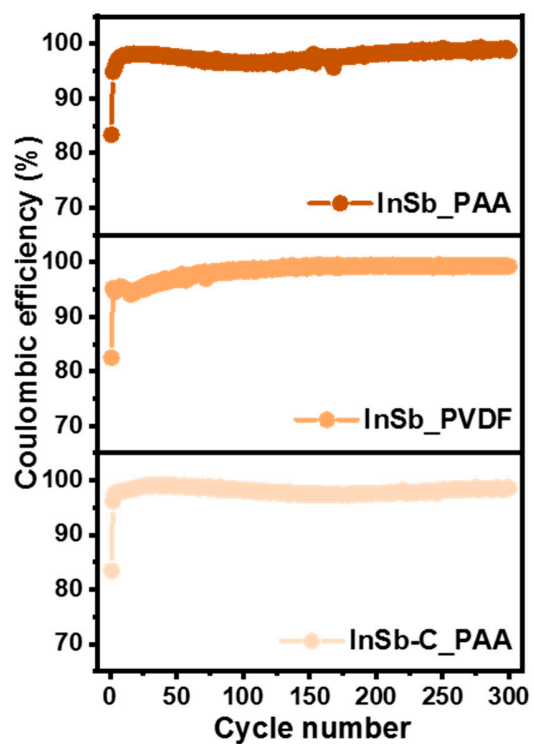

**Figure S10.** Coulombic efficiency of InSb\_PAA, InSb\_PVDF, and InSb-C\_PAA at current density of (a) 100 and (b) 500 mA g<sup>-1</sup>.

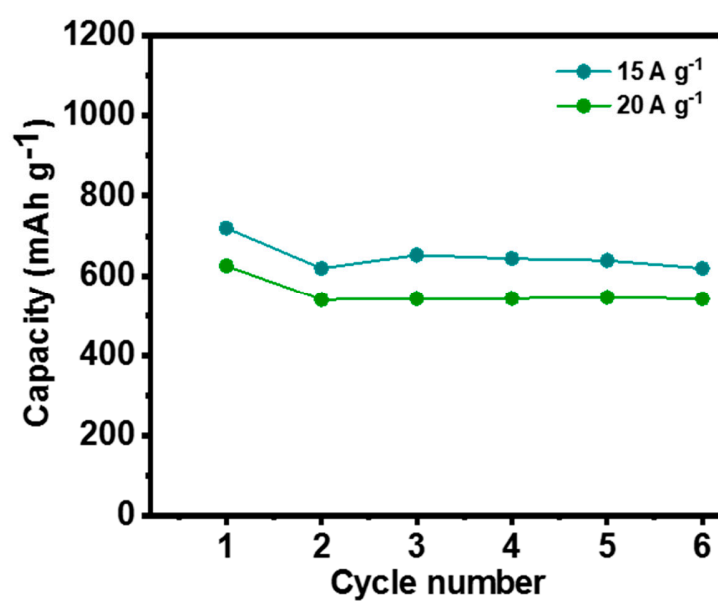

**Figure S11.** Cyclic performance of InSb-C\_PAA at 15 A g<sup>-1</sup> and 20 A g<sup>-1</sup>.

**Table S1.** Crystallite size of InSb calculated using Scherrer equation.

|                                                                                  | Facets | FWHM( $\beta$ )/Radian | Crystallite size (nm) | Average size (nm) |
|----------------------------------------------------------------------------------|--------|------------------------|-----------------------|-------------------|
| InSb                                                                             | (111)  | 0.0133                 | 10.5504               | 5.3314            |
|                                                                                  | (220)  | 0.0191                 | 7.6469                |                   |
|                                                                                  | (311)  | 0.0223                 | 6.6994                |                   |
|                                                                                  | (400)  | 0.0413                 | 3.7726                |                   |
|                                                                                  | (331)  | 0.0303                 | 5.2875                |                   |
|                                                                                  | (422)  | 0.0368                 | 4.5826                |                   |
|                                                                                  | (511)  | 0.0532                 | 3.2761                |                   |
|                                                                                  | (440)  | 0.2218                 | 0.8355                |                   |
| Scherrer formula: $= \frac{0.89\lambda}{\beta \cos\theta}$ , $\lambda=0.1541$ nm |        |                        |                       |                   |

**Table S2.** Coulombic efficiency variation of InSb\_PAA at various cycle numbers measured at 100 mA g<sup>-1</sup>.

| Cycle number | Coulombic efficiency (%) |
|--------------|--------------------------|
| 1            | 80.42                    |
| 2            | 90.95                    |
| 4            | 93.46                    |
| 8            | 95.38                    |
| 20           | 97.65                    |
| 40           | 97.68                    |
| 60           | 97.69                    |
| 80           | 96.40                    |
| 140          | 97.53                    |

**Table S3.** Coulombic efficiency variation of InSb\_PAA at various cycle numbers measured at 500 mA g<sup>-1</sup>.

| Cycle number | Coulombic efficiency (%) |
|--------------|--------------------------|
| 1            | 83.35                    |
| 2            | 94.88                    |
| 4            | 95.99                    |
| 8            | 97.61                    |
| 20           | 97.63                    |
| 40           | 97.80                    |
| 60           | 97.39                    |
| 80           | 97.25                    |
| 100          | 96.53                    |

**Table S4.** Calculation of capacity contribution of InSb and C in the InSb–C composite.

|                                                           | InSb   | C    |
|-----------------------------------------------------------|--------|------|
| The mole of Li-ion participating reaction                 | 4      | 0.17 |
| Molecular weight<br>(g mol <sup>-1</sup> )                | 236.58 | 12   |
| Calculated theoretical capacity<br>(mAh g <sup>-1</sup> ) | ~454   | ~380 |
| Actual weight fraction in the InSb-C composite.           | 0.86   | 0.12 |
| Contributed capacity<br>(mAh g <sup>-1</sup> )            | 390    | 45.6 |
| Capacity contribution<br>(%)                              | 90     | 10   |



**Table S5.** Calculation of theoretical capacity of InSb and InSb–C.

| Anode material                                                | InSb | InSb-C |       |
|---------------------------------------------------------------|------|--------|-------|
|                                                               | InSb | InSb   | C     |
| Theoretical weight faction                                    | 0.98 | 0.86   | 0.12  |
| Theoretical capacity<br>(mAh g <sup>-1</sup> )                | ~454 | ~454   | ~380  |
| Contributed theoretical<br>capacity<br>(mAh g <sup>-1</sup> ) | ~445 | ~390   | ~45.6 |
| Total theoretical capacity<br>(mAh g <sup>-1</sup> )          | ~454 | ~435.6 |       |

**Table S6.** Coulombic efficiency of InSb\_PAA, InSb\_PVDF, and InSb-C\_PAA at current density of 100 mA g<sup>-1</sup> for initial 10 cycles.

| Cycle number | Coulombic efficiency (%) |           |            |
|--------------|--------------------------|-----------|------------|
|              | InSb_PAA                 | InSb_PVDF | InSb-C_PAA |
| 1st          | 81.42                    | 83.53     | 80.58      |
| 2nd          | 90.95                    | 91.74     | 92.78      |
| 3rd          | 91.69                    | 92.79     | 94.55      |
| 4th          | 93.46                    | 93.89     | 95.55      |
| 5th          | 94.54                    | 94.72     | 95.78      |
| 6th          | 95.31                    | 95.13     | 96.57      |
| 7th          | 95.39                    | 95.66     | 96.74      |
| 8th          | 95.37                    | 95.84     | 96.90      |
| 9th          | 96.12                    | 95.73     | 97.12      |
| 10th         | 96.48                    | 95.68     | 97.32      |

**Table S7.** Coulombic efficiency of InSb\_PAA, InSb\_PVDF, and InSb-C\_PAA at current density of 500 mA g<sup>-1</sup> for initial 10 cycles.

| Cycle number | Coulombic efficiency (%) |           |            |
|--------------|--------------------------|-----------|------------|
|              | InSb_PAA                 | InSb_PVDF | InSb-C_PAA |
| 1st          | 83.35                    | 82.50     | 83.44      |
| 2nd          | 94.88                    | 95.20     | 96.16      |
| 3rd          | 95.28                    | 94.68     | 97.37      |
| 4th          | 95.99                    | 94.63     | 97.62      |
| 5th          | 96.72                    | 95.06     | 97.79      |
| 6th          | 97.18                    | 95.25     | 97.97      |
| 7th          | 97.43                    | 95.51     | 97.89      |
| 8th          | 97.61                    | 95.35     | 98.02      |
| 9th          | 97.77                    | 95.42     | 98.06      |
| 10th         | 97.83                    | 95.28     | 98.06      |

**Table S8.** The charge-transfer resistance ( $R_{ct}$ ) of InSb\_PAA, InSb\_PVDF, InSb-C\_PAA.

|           | InSb_PAA       | InSb_PVDF       | InSb-C_PAA      |
|-----------|----------------|-----------------|-----------------|
| 1 cycle   | 54.29 $\Omega$ | 48.44 $\Omega$  | 116.74 $\Omega$ |
| 5 cycles  | 38.17 $\Omega$ | 105.91 $\Omega$ | 51.92 $\Omega$  |
| 20 cycles | 21.56 $\Omega$ | 55.68 $\Omega$  | 19.37 $\Omega$  |
